# Supplementary material
Source: PubMed Central journal article supplement (PMC6084431)
Supplement: NIHMS983138-supplement-S1.pdf [file NIHMS983138-supplement-S1.pdf]

# Figure S1

|          |     | K757del                                                                                                            |                                                                         |                                                    |     |  |
|----------|-----|--------------------------------------------------------------------------------------------------------------------|-------------------------------------------------------------------------|----------------------------------------------------|-----|--|
| hsCDK12  | 726 | KFDIIGIIGEGTYGQVYKAK--D-KDTGELVALKVVRLDNEKEGFP---ITAIREIKILRQLI---HRSVNMKEIVT [7] FKKDKgaFYLVFEYMDHDLMLGL [1] ---  | 825                                                                     |                                                    |     |  |
| hsCDK13  | 704 | KFDIIGIIGEGTYGQVYKAR--D-KDTGEMVALKVVRLDNEKEGFP---ITAIREIKILRQLT---HQSIINMKEIVT [7] FKKDKgaFYLVFEYMDHDLMLGL [1] --- | 803                                                                     |                                                    |     |  |
| hsCDK9   | 18  | KYEKLAKIQGGTFGEVFKAR--H-RKTGQKVALKVVLMENEKEGFP---pITALREIKILQLLK---HENVVNLIEICR [5] YNRCKgsIYLVDFDFCEHDLAAGL       | SNV 117                                                                 |                                                    |     |  |
| hsCDK3   | 3   | MFQKVEKIGEGTYGVVYKAK--N-RETGQLVALKIRLDLEMEG---vpSTAIREISLLKELK---HPNIVRLLDVVH                                      | -NERK--LYLVFEFLSQDLKKYM                                                 | DST 94                                             |     |  |
| hsCDK2   | 3   | NFQKVEKIGEGTYGVVYKAR--N-KLTGEVVALKIRLDTEGEG---vpSTAIREISLLKELN---HPNIVKLLDVIH                                      | -TENK--LYLVFEFLHQLDKKFM                                                 | DAS 94                                             |     |  |
| hsCDK1   | 9   | DYTKIEKIGEGTYGVVYKGR--H-KTTGQVAMKIRLESEEEG---vpSTAIREISLLKELR---HPNIVSLQDVLN                                       | -QDSR--LYLVFEFLSMDLKKYL                                                 | DSI 94                                             |     |  |
| hsCDK20  | 5   | QYICLGRIGEGAGHIVFKAK--H-VETGEI VALKVVRLRLEDEGFP---pNQALREIKALQEME--dnQYVVQLKAVFP                                   | ---HGggFVLAFEFMLSDLAEVV                                                 | RHA 95                                             |     |  |
| hsCDK5   | 9   | KYEKLEKIGEGTYGVVYKAK--S-RETGEI VALKVVRLDDDEGFP---vpSSALREICLLKELK---HKNI VRLHDVHL                                  | -SDKK--LTLVFEFCQDLKKYF                                                  | DSC 94                                             |     |  |
| hsCDK11b | 168 | EFQCLNRIEETGYGVVYRAK--D-KKTDEI VALKVVRLMEKEGFP---pITSLREINTILKAQ---HPNIVTVREIVV [1] SNMdk--IYIVMNYVEHDLKSLM        | ETM 261                                                                 |                                                    |     |  |
| hsCDK10  | 38  | EFQCLNRIEETGYGVVYRAK--D-TQTDEI VALKVVRLMEKEGFP---ipISSLREITLLRLR---HPNIVELKEVVV                                    | GNHLE-sIFLVMGYCEQDLASLL                                                 | ENM 131                                            |     |  |
| hsCDK18  | 179 | TYVKLDKLGEGTYATVFKGR--S-KLTENLVALKEIRLEHEEGAPC---TAIREVSLKLNK---HANIVTLHDLIH                                       | -TDRS--LTLVFEYLDSDLKQYL                                                 | DHC 263                                            |     |  |
| hsCDK16  | 170 | TYKLDKLGEGTYATVFKGR--S-KLTENLVALKEIRLEHEEGAPC---TAIREASLLKELK---HANIVTLHDLIH                                       | -TKET--LTLVFEYLDKDLKQYL                                                 | DDC 260                                            |     |  |
| hsCDK17  | 197 | TYIKLEKLGEGTYATVYKGR--S-KLTENLVALKEIRLEHEEGAPC---TAIREVSLKDLK---HANIVTLHDLIH                                       | -TDKS--LTLVFEYLDKDLKQYM                                                 | DDC 281                                            |     |  |
| hsCDK7   | 11  | RYEKLDFLGEQFATVYKAR--D-KNTNQIVAIKKIKLGRHSEAKDginRTALREIKLQELS---HPNIGLDDAFG                                        | -HKSr--ISLVDFEMETDLVETI                                                 | KDN 105                                            |     |  |
| hsCDK6   | 12  | QYECVAIEIGEGAYGKVPKAR--D-KNGGRFVALKVVRLVQTEGEGFP---mpLSTIREVAVLRHLEtfeHPNVVRLFDVCT [4] DRETk--LTLVFEHVQDLITTYL     | DRK 112                                                                 |                                                    |     |  |
| hsCDK14  | 140 | SYEKLEKIGEGTYGVVYKAK--S-KVNGKLVAIKVVRLQEEEGFP---TAIREASLLKELK---HANIVLHDLIH                                        | -TKET--LTLVFEYMDHDLKQYM                                                 | KHV 224                                            |     |  |
| hsCDK15  | 108 | SYLNLEKLGEGSYATVYKGI--S-RINGQLVALKVVISMNAEEGVPF---TAIREASLLKELK---HANIVLHDLIH                                      | -TKET--LTLVFEYMDHDLKQYM                                                 | SOH 192                                            |     |  |
| hsCDK4   | 5   | RYEPVAEIGVAYGTVYKAR--D-PHSGHFVALKVVRLVGGGGGgIpISTVREVALRRLAefehPNVVRMLDVCA [4] DREIK--VTLVFEHVQDLRTRYL             | DKA 107                                                                 |                                                    |     |  |
| hsCDK1   | 4   | KYEKIGKIGEGSYGVVFKCR--N-RDTGQIVAIKKFLSEDDPV---ikkIALREIRMLKQLK---HPNLVNLLEVFR                                      | -RKRr--LHLVFEYCDHTVLHEL                                                 | DRA 95                                             |     |  |
| hsCDK2   | 3   | KYENLDGVLGEGSYGMVKCR--N-KDTGRIVAIKKFLRQEEEGFP---KIAMREIKLLKQLR---HENLVNLLEVCK                                      | -KKRr--WYLVFEYFMDTLLDDL                                                 | ELF 94                                             |     |  |
| hsMAPK1  | 27  | RYTNLSYIGEGAYGMVCSAY--D-NVNKVRVAIKKIS--PFEHQTYC---QRTLREIKILLRFR---HENIIGINDIIR [4] EQMKD--YVIQDLMETDLYKLL         | KTQ 119                                                                 |                                                    |     |  |
| hsMAPK3  | 47  | RYTQLQYIGEGAYGMVSSAY--D-HVRKTRVAIKKIS--PFEHQTYC---QRTLREIQILLRFR---HENVIGIRDILR [4] EAMRD--YVIQDLMETDLYKLL         | KSQ 136                                                                 |                                                    |     |  |
| hsMAPK7  | 54  | EYETIETIGNGAYGVSSAR--R-RLTGQVVAIKKIPNAPDVVTNA---KRTLREIKILKHFK---HDNI IAKDILR [5] GEFKS--YVVLDLMSDLHQII [1] --SS   | 151                                                                     |                                                    |     |  |
| hsMAPK12 | 26  | VYRDLPVGGSGAYGAVCSAV--D-GRTGAKVAIKKFLRPFQSEIFA---KRAYRELRLKHMGR---HENVIGLLDVFT [5] DDFTD--FYLVMFPMQDTLQKML         | KHE 123                                                                 |                                                    |     |  |
| hsMAK    | 3   | RYTMRQLGDGTYSVLMGK--S-NEGSELVAIKRMKRKPYSWDEC---MNLREVKSLKLN---HANVIKKEVIR                                          | --END-hLYFIFEYMKENLYQLM [1] DRN                                         | 94                                                 |     |  |
| hsCDK19  | 26  | EYE-GCKVGRGTYGHVYKARkd-GKDEKEYALQIE-----GTG-isMSACREIALRELK---HPNVIALQKVFL [1] HSDRK--VWLLFDYAEHDLWHII [6] KAN     | 117                                                                     |                                                    |     |  |
| hsNLK    | 137 | DIEPDRPIGYGAFGVVSVT--D-PRDGKRVALKKMPNVFQNLVSC---KRVFRELKMLCFK---HDNVLSALDILQ [4] DYFEE--IYVVTLMQSDLHKII            | VSP 233                                                                 |                                                    |     |  |
| hsMAPK13 | 24  | TYVSPDTHVGGSGAYGAVCSA--D-KRSGEKVAIKKFLRPFQSEIFA---KRAYRELRLKHMGR---HENVIGLLDVFT [5] RNFYD--FYLVMFPMQDTLQKML        | GME 121                                                                 |                                                    |     |  |
| hsMAPK15 | 12  | RYLLRRQLQGAYGIVWKAV--D-RRTGEVVAIKKIFADFRDKTDA---QRTFREITLQEFG--dHPNIIISLLDVIR [1] ENDRD--IYLVFEFMDTDLNAVI          | RRG 106                                                                 |                                                    |     |  |
|          |     |                                                                                                                    |                                                                         |                                                    |     |  |
|          |     | R858W                                                                                                              |                                                                         |                                                    |     |  |
| hsCDK12  | 826 | SGLvHFSEDHIKSFMKQLMEGLECYHKKNFLHRDIKCSNILLN                                                                        | NSGQIKLADDFGLARLYN                                                      | SEes--RPYTNKVITLWYRPELLLGEERYTPAIDVWVSCGCIIGELFTK  | 932 |  |
| hsCDK13  | 804 | SGLvHFENENHIKSMFRQLMEGLDYCYHKKNFLHRDIKCSNILLN                                                                      | NRGQIKLADDFGLARLYS                                                      | SEes--RPYTNKVITLWYRPELLLGEERYTPAIDVWVSCGCIIGELFTK  | 910 |  |
| hsCDK9   | 118 | LV---KFTLSEIKRVMQMLNGLLYIHRNKILHRDMKAANVLIT                                                                        | RDGVLKADDFGLARAFS [5] QPnr----                                          | YTNRVVTLWYRPELLLGERDYGPPIDLWGAGCIIMAEWTR           | 225 |  |
| hsCDK3   | 95  | PggsELPLHLIKSYLFQLLQGVSFCHSHRVIHRDLKPNLLIN                                                                         | ELGAIKADDFGLARAFG                                                       | VP---LRTYTHEVTLWYRAPELLLGSSTAVDIWSIGICIFAEMVTR     | 199 |  |
| hsCDK2   | 95  | A-ltGIPLPLIKSYLFQLLQGLAFCHSHRVLHRDLKPNLLIN                                                                         | TEGAIKADDFGLARAFG                                                       | VP---VRTYTHEVTLWYRAPELLLGSSTAVDIWSIGICIFAEMVTR     | 199 |  |
| hsCDK1   | 95  | PpgqYMDSSLVKSXYLQLQGVIFVCHSRVLRDLKPNLLID                                                                           | DKGTIKADDFGLARAFG                                                       | IP---IRVVTHEVTLWYRSPVLLGSARYSTPVDIWSIGITFAELATK    | 200 |  |
| hsCDK20  | 96  | QR---PLAQAVKSYLQMLKGVAFCHANNIVHRDLKPNLLIS                                                                          | ASGQLKIADDFGLARVFS                                                      | -Pdg-SRLYTHQVATRWYRAPELLYGARQYDQGVLDVSWGCIIMGELLNG | 200 |  |
| hsCDK5   | 95  | NG---DLDPBEIVKSYLFQLLQGLGFCHSRNLVHRDLKPNLLIN                                                                       | ERGELKADDFGLARAFG                                                       | IP---VRCYSAEVTLWYRPPDILLGSDYSTQIDMWGVCIFVEMATG     | 198 |  |
| hsCDK11b | 262 | KQ---PFLPGEVKTLMIQLLRGVHLHDNWLHRDLKTSNLLLS                                                                         | HAGILKVGDFGLAREYG                                                       | SP---LKAYPEVVTWYRAPELLLGAKEYSTAVDMWVSGCIFGELLTQ    | 365 |  |
| hsCDK10  | 132 | PT---PFSEAQVKCIVLQVLRGLQYLHRNFIIHRDLKVSNNLMT                                                                       | DKGCVKADDFGLARAYG                                                       | VP---VKPMTPKVVTWYRAPELLLGTTPQTSTIDMWAVGCI LAELLAH  | 235 |  |
| hsCDK18  | 264 | GN---IIMHNVKLFYQLRGLRAYCHRRKILHRDLKPNLLIN                                                                          | ERGELKADDFGLARAKS                                                       | VP---TKTYSNEVVTWYRPPDVLGSTEYSTPIDMWGVCIFHEMATG     | 367 |  |
| hsCDK16  | 261 | GN---IIMHNVKLFYQLRGLRAYCHRRKILHRDLKPNLLIN                                                                          | ERGELKADDFGLARAKS                                                       | IP---TKTYSNEVVTWYRPPDILLGSDYSTQIDMWGVCIFVEMATG     | 358 |  |
| hsCDK17  | 282 | GN---IIMHNVKLFYQLRGLRAYCHRRKILHRDLKPNLLIN                                                                          | EKGEKADDFGLARAKS                                                        | VP---TKTYSNEVVTWYRPPDVLGSSSEYSTQIDMWGVCIFFEMASG    | 385 |  |
| hsCDK7   | 106 | SL---VLTSPSHIKAYMLTLQGLEYLHQHWILHRDLKPNLLLD                                                                        | ENGVLKADDFGLARAFS                                                       | SP---NRAYTHQVTRWYRAPELLFGARMYGVGDMWAVGCI LAELLLR   | 209 |  |
| hsCDK6   | 113 | PE-pGVPTETIKDMFQLRGLDFLHSHRVVHRDLKPNILVT                                                                           | SSGQIKLADDFGLARIYS                                                      | FQ---M-ALTSVVVTLWYRAPEVLLQSS--YATPVDLWVSGCIFAEMFRR | 215 |  |
| hsCDK14  | 225 | PG---GLHPDNVKLFLFQLRGLSYIHQRYILHRDLKPNLLIS                                                                         | DTGELKADDFGLARAKS                                                       | VP---SHTYSNEVVTWYRPPDVLGSTEYSTQIDMWGVCIFVEMIQG     | 328 |  |
| hsCDK15  | 193 | PG---GLHPDNVKLFLFQLRGLSYIHQRYILHRDLKPNLLIS                                                                         | HLGELKADDFGLARAKS                                                       | IP---SQTYSSEVVTWYRPPDALLGATEYSSSELDIWGAGCIFIEMFQG  | 296 |  |
| hsCDK4   | 108 | PP-pGLPAETIKDLMRQFLRGLDFLHANCIVHRDLKPENILVT                                                                        | SGGTVKADDFGLARIYS                                                       | YQ---M-ALTPVVVTLWYRAPEVLLQST--YATPVDMWVSGCIFAEMFRR | 210 |  |
| hsCDK1   | 96  | QR---GVPEHLVKSITWTLQAVNFCFKHNCIHRDVKPENILIT                                                                        | KHSVIKCLDFGFARLLT                                                       | GP---SDYYTDYVATRWYRSPVLLGSDYQYGPVVDVWAIICGVFAELLSG | 199 |  |
| hsCDK2   | 95  | PN---GLDYQVQKYLFLQINGIGFCSHSNIIHRDLKPENILVS                                                                        | QSGVVKCLDFGFARTLA                                                       | APge---VYTDYVATRWYRAPELLVGDVYKAVDVAICLVTTEMFMG     | 198 |  |
| hsMAPK1  | 120 | H----LSNDHICYFLYQLIRGLKYIHSANVLHRDLKPSNLLLN                                                                        | TTCDLKICDFGLARVAD                                                       | PdhdtGFLTEYVATRWYRAPEIMLSKGYTKSIDIWSVGCILAEMLSN    | 224 |  |
| hsMAPK3  | 137 | Q----LSNDHICYFLYQLIRGLKYIHSANVLHRDLKPSNLLLN                                                                        | TTCDLKICDFGLARIAD                                                       | PEhdhTGFLETVATRWYRAPEIMLSKGYTKSIDIWSVGCILAEMLSN    | 241 |  |
| hsMAPK7  | 152 | QP---LTLEHVRYFLYQLRGLKYMHAQAIVHRDLKPSNLLVN                                                                         | ENCELKIDDFGMARGLC [1] SpaehQYFMTEYVATRWYRAPEMLSLHEYTQAIIDLWVSGCIFGEMLAR | 258                                                |     |  |
| hsMAPK12 | 124 | K----LGEDIQIRFLYQMLKGLRYIHAAGIIHRDLKPNLAVN                                                                         | ENCELKIDDFGLARQAD                                                       | SE-----MTGYVVTRWYRAPEVLLNWMRYTQVDIWSVGCIMAEMITG    | 212 |  |
| hsMAK    | 95  | KL---FPESIVRNIMYQLQLGLAFIHKHGFHRDMKPNLLCM [2] --ELVKIADDFGLARELR [2] PP-----                                       | YTDYVTRWYRAPEVLLNWSVSPIDVWAVGSIIMAEYML                                  | 196                                                |     |  |
| hsCDK19  | 118 | KKpmlQPRSMVKSLLYQLIDGIIHVLHANVWVHRDLKPNILVM [4] ERGRVKIADMGFARLFN                                                  | SP1kplADLDVVVTFWYRAPELLLGGARHYTKAIDIWAIIGCIFAELLTS                      | 230                                                |     |  |
| hsNLK    | 234 | QP---LSSDHVKVFLYQLIRGLKYIHSAGILHRDKPKNLLVN                                                                         | SNCVLIKDFGLARVEE                                                        | LDes--RHMTQEVVTVYRAPEILMGSRRHYSNAIDIWSVGCIFAELLTG  | 337 |  |
| hsMAPK13 | 122 | ----FSEKIQYLVYQMLKGLKYIHSAGVHRDLKPNLAVN                                                                            | ENCELKIDDFGLARHAD                                                       | AE-----MTGYVVTRWYRAPEVILSMWHNYQTVDIWSVGCIMAEMLTG   | 219 |  |
| hsMAPK15 | 107 | GL---LQDVHVRSLFYQLLRATRFLHSGHVHRDKPKNLLLD                                                                          | ANCTVKLDFGLARSLG [4] Gped--                                             | QAVTEYVATRWYRAPEVILSGVMDLWVSGCILAEMLRG             | 214 |  |
