# Supplementary material
Source: PubMed Central journal article supplement (PMC6084431)

# Figure S2

## A

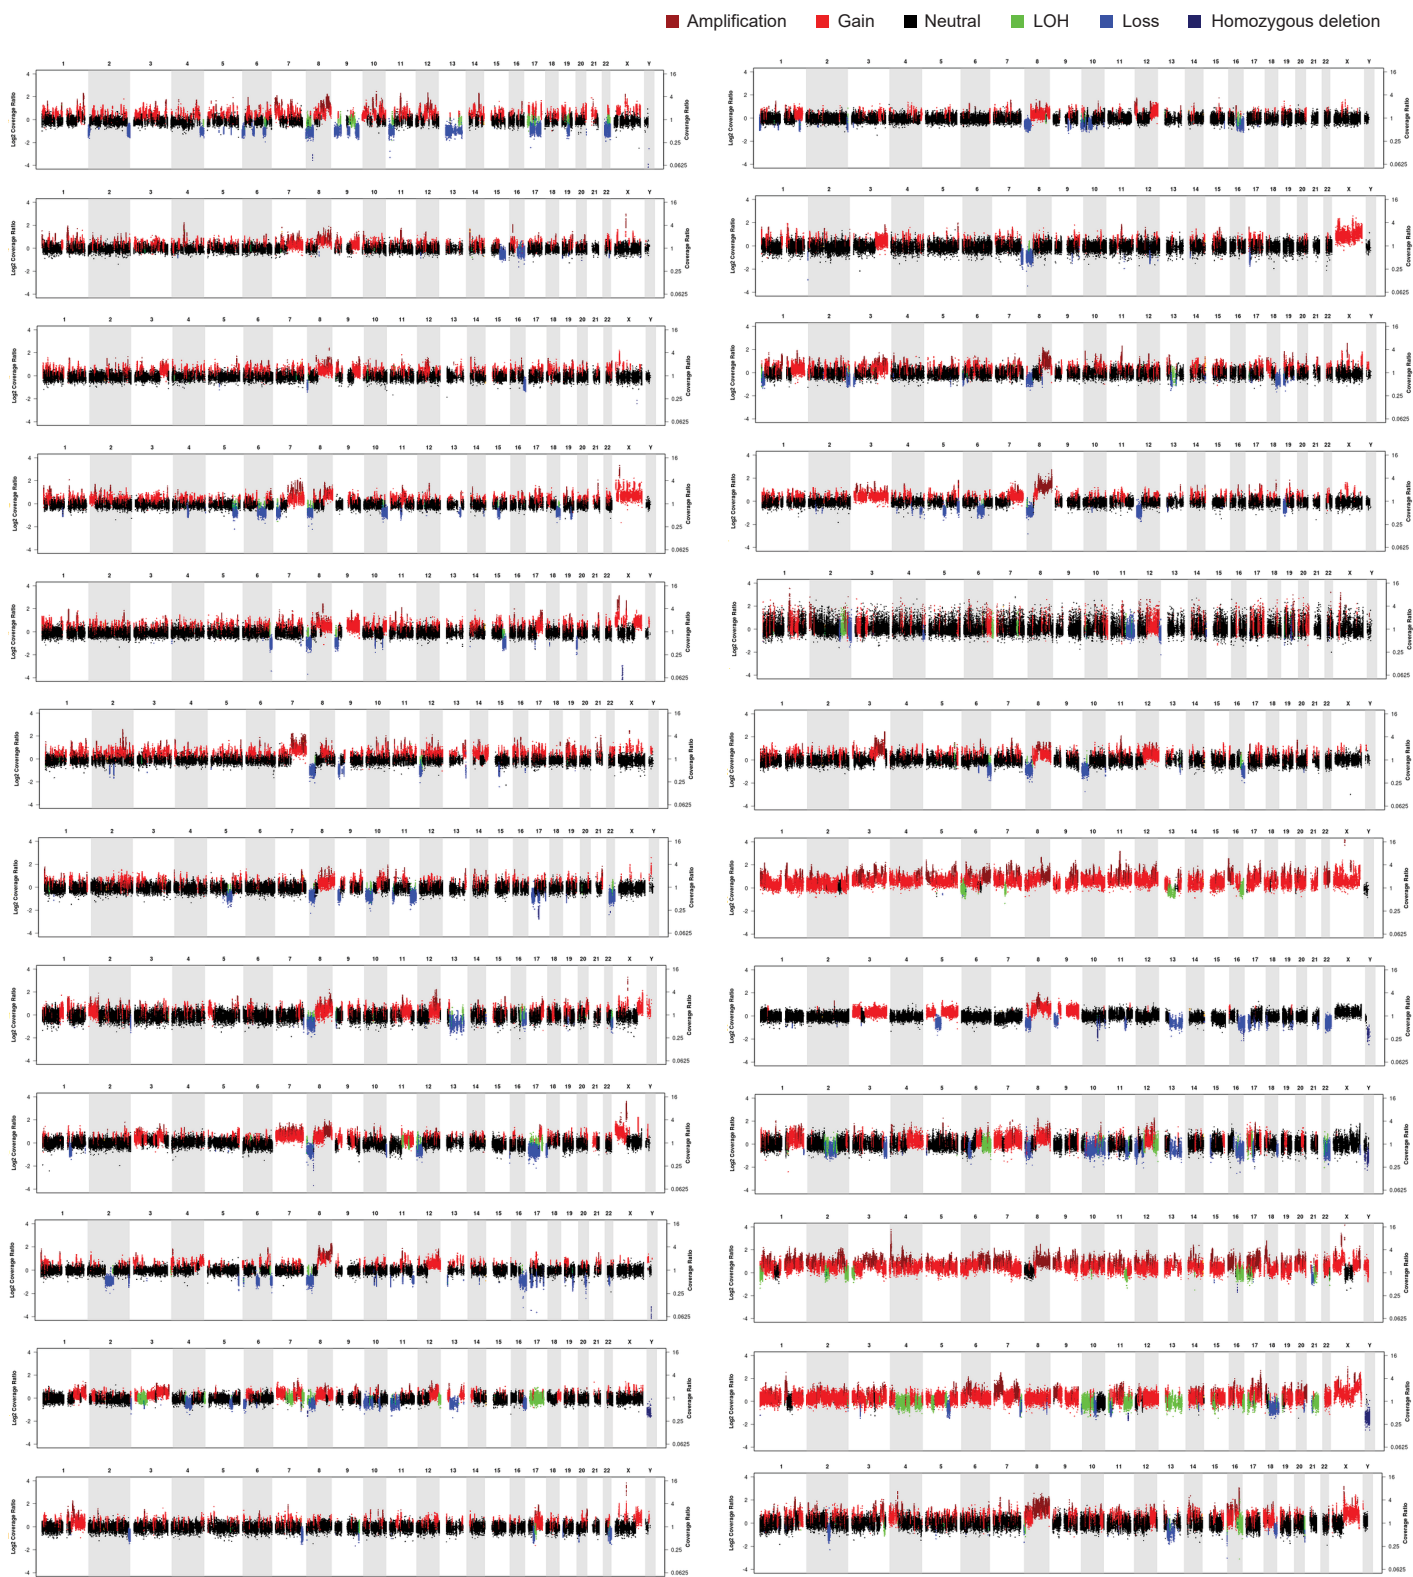

## B

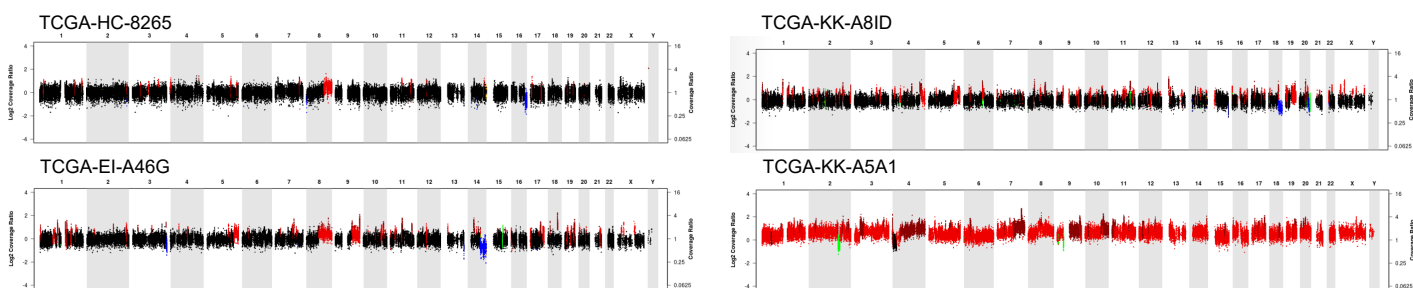

Supplement: NIHMS983138-supplement-S2.pdf [file NIHMS983138-supplement-S2.pdf]

# Figure S3

## A

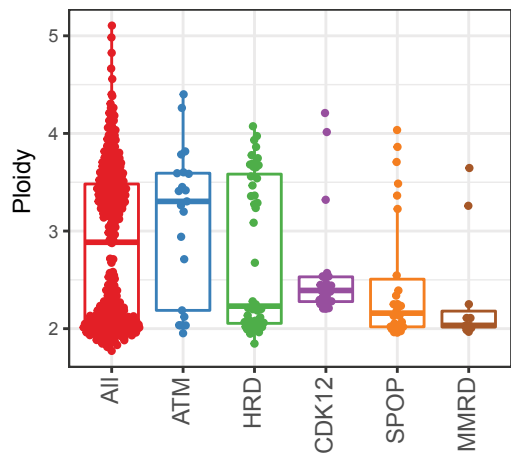

## B

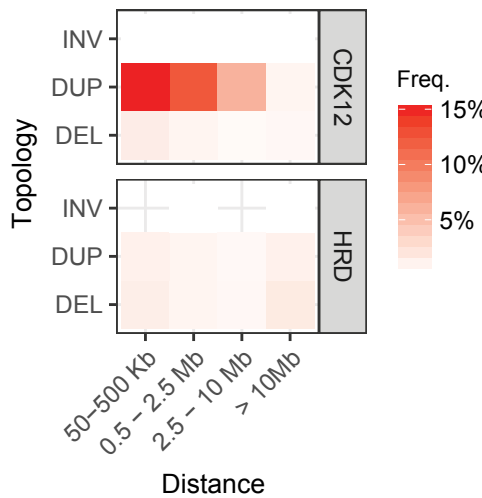

## C

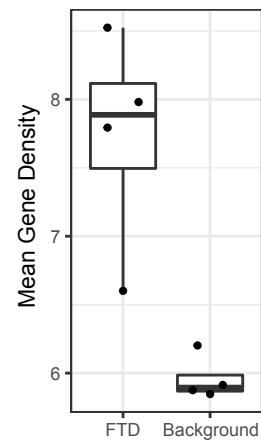

## D

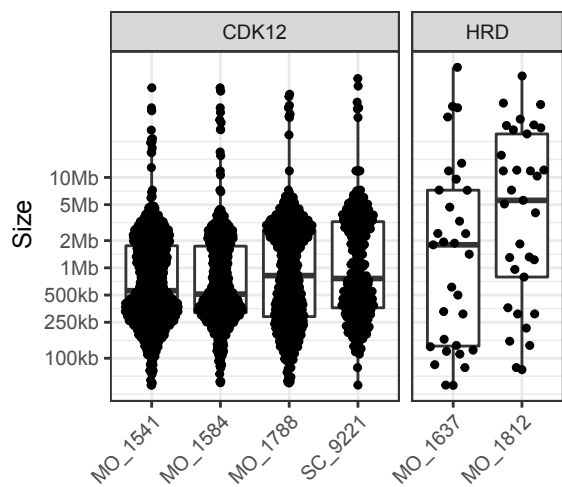

## E

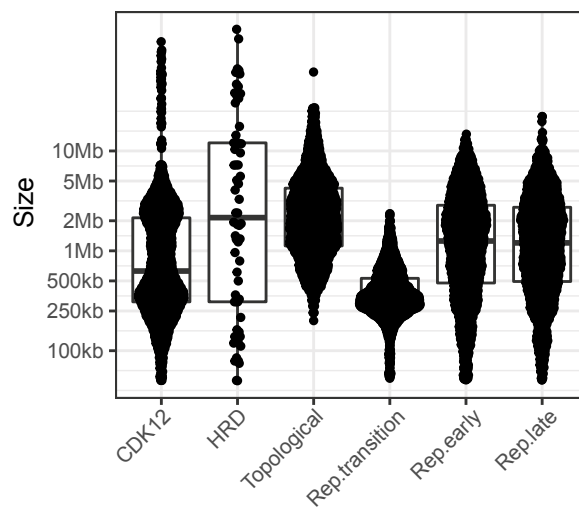

## F

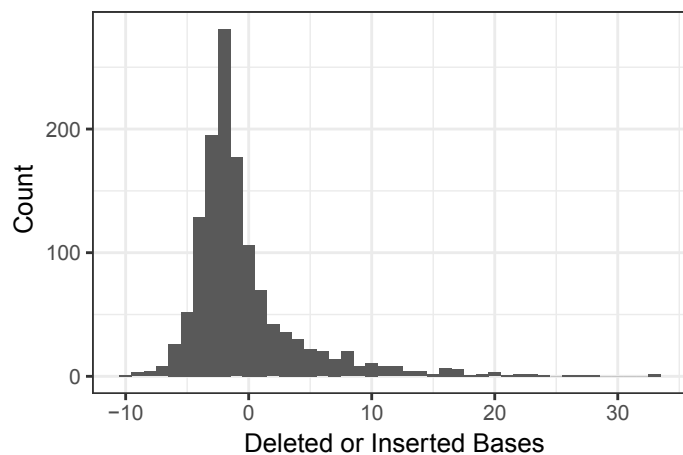

Supplement: NIHMS983138-supplement-S3.pdf [file NIHMS983138-supplement-S3.pdf]

# Figure S4

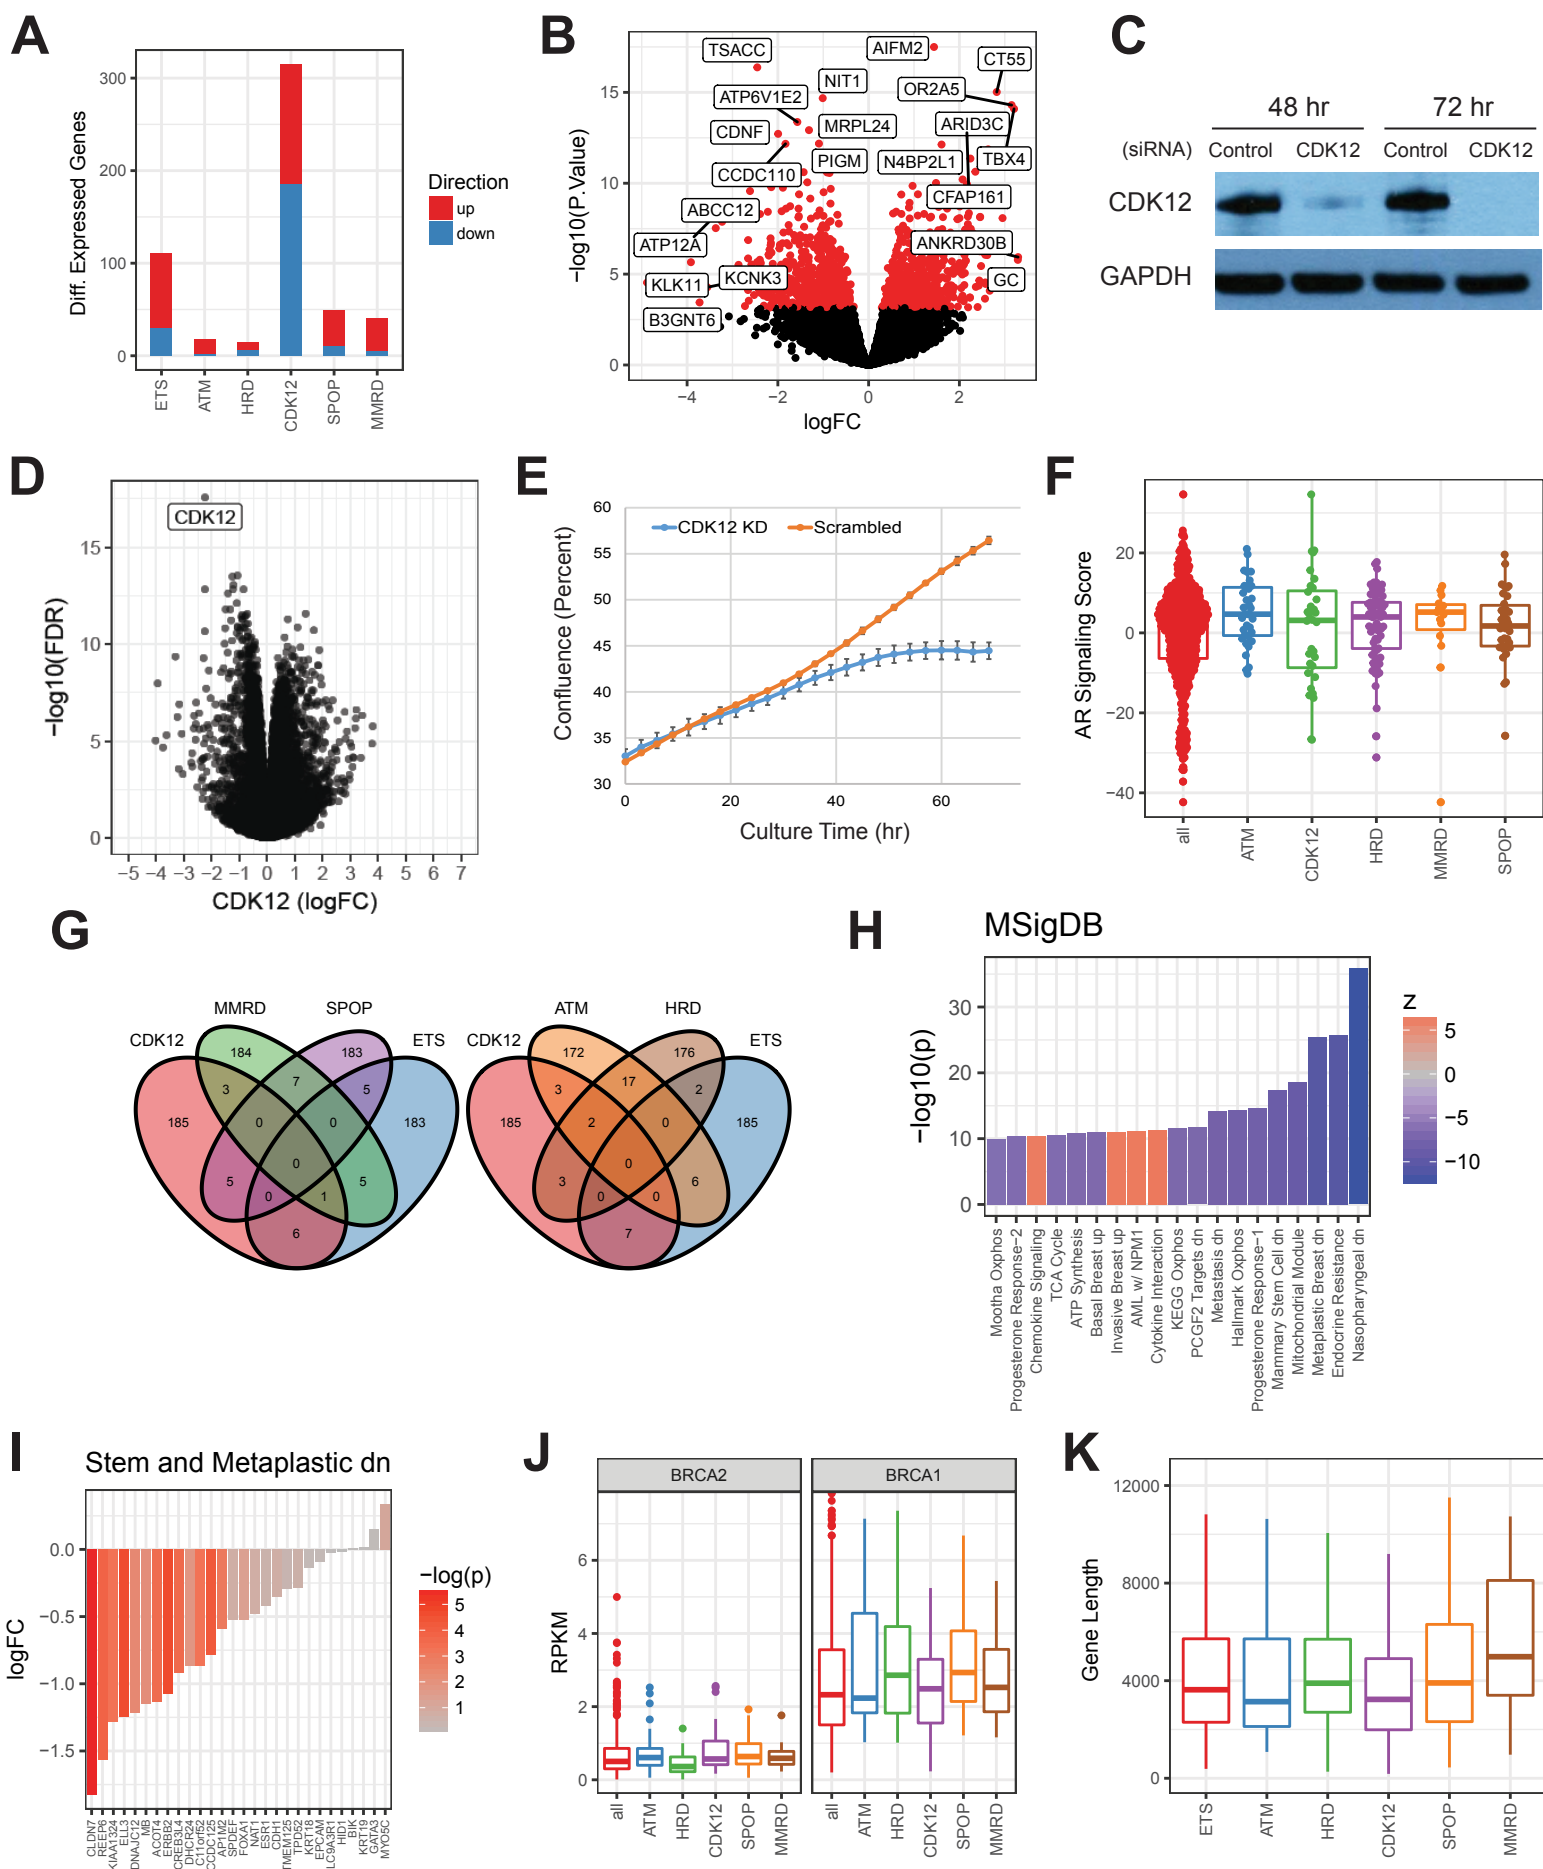

Supplement: NIHMS983138-supplement-S4.pdf [file NIHMS983138-supplement-S4.pdf]

Figure S5

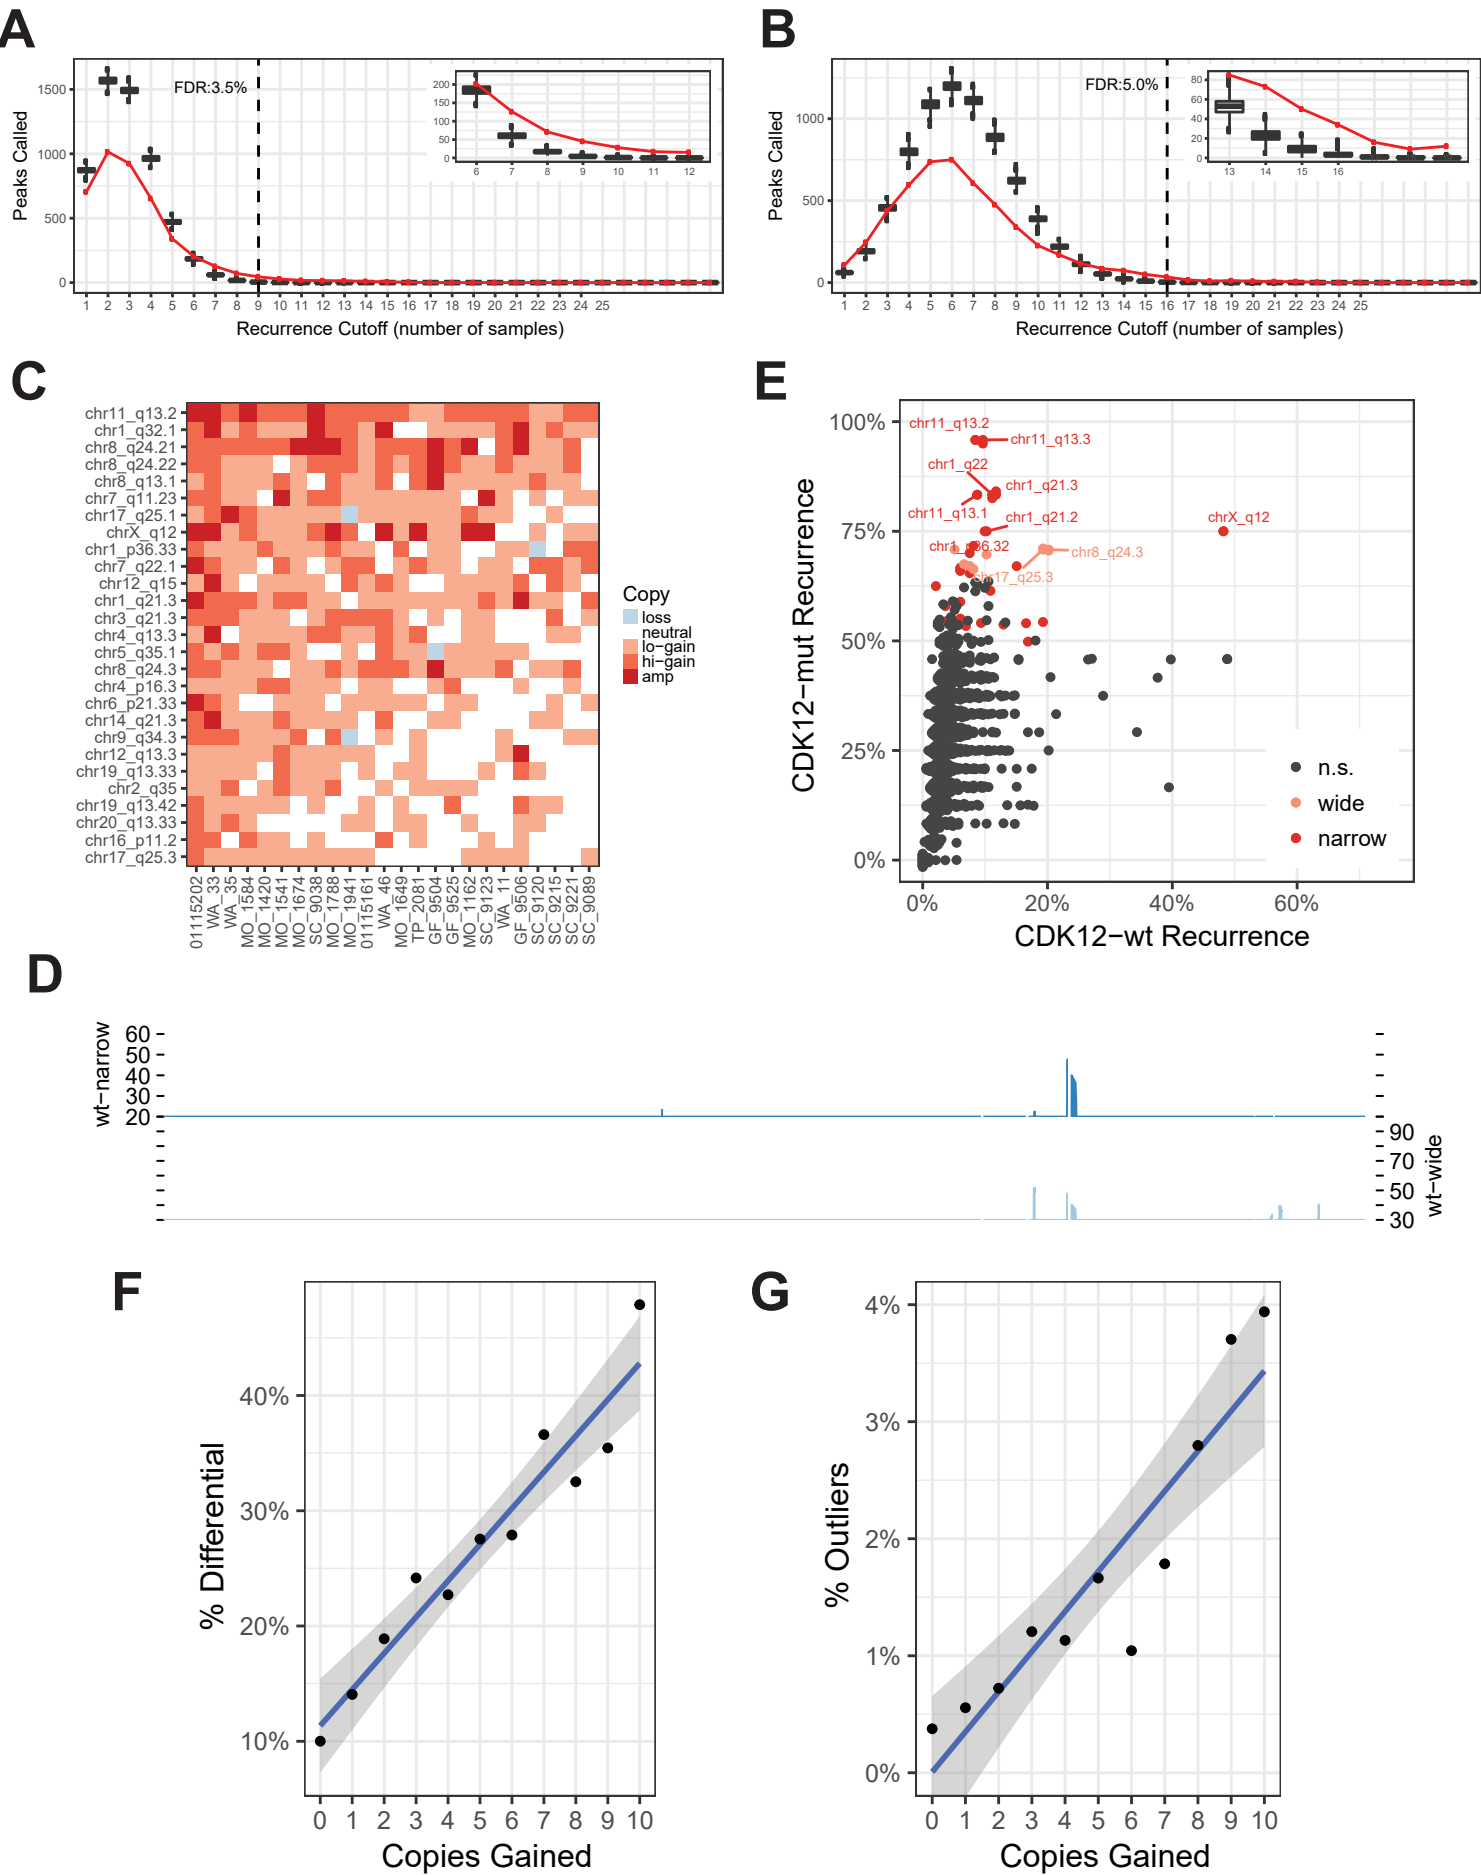

Supplement: NIHMS983138-supplement-S5.pdf [file NIHMS983138-supplement-S5.pdf]

# Figure S6

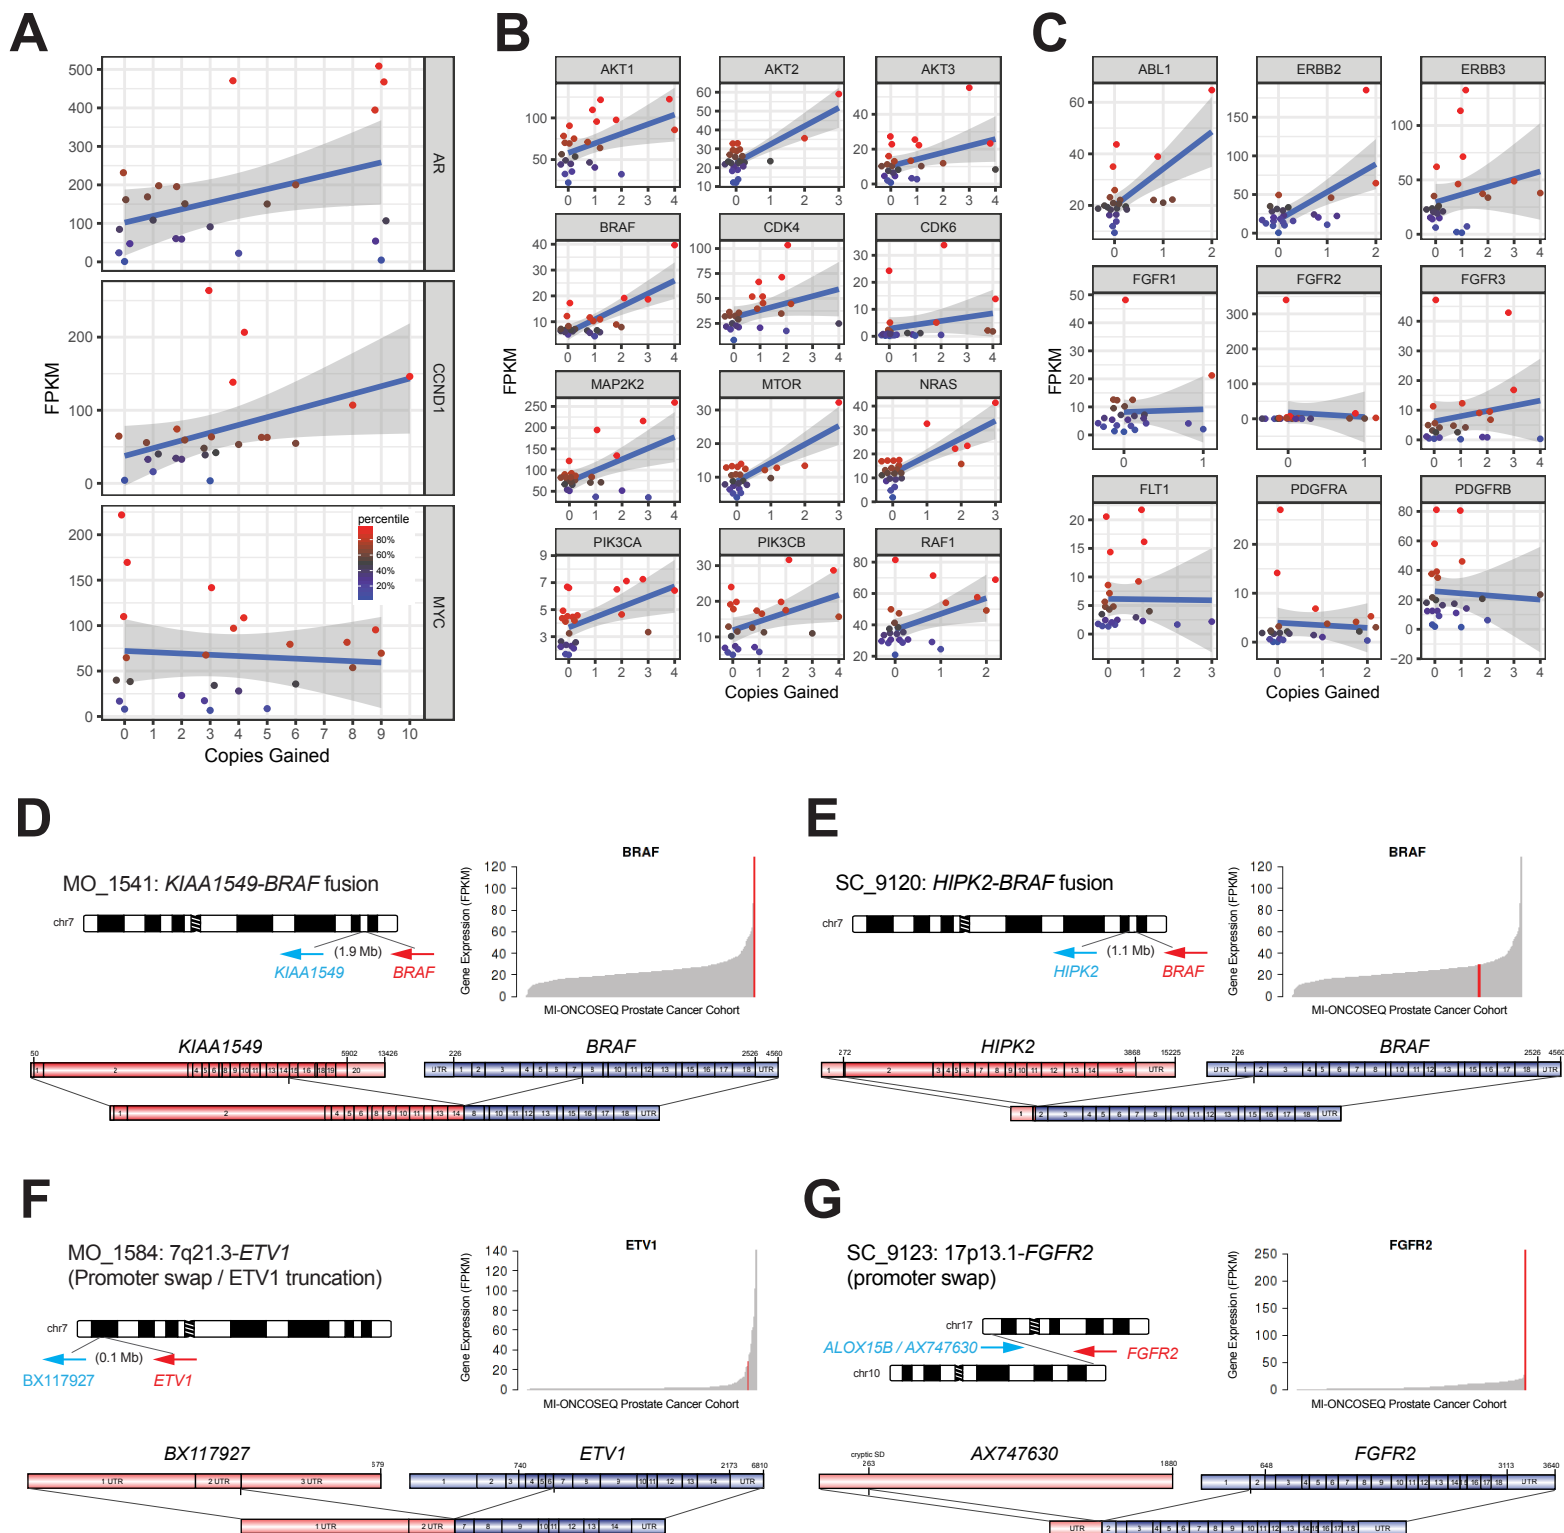

Supplement: NIHMS983138-supplement-S6.pdf [file NIHMS983138-supplement-S6.pdf]

# Figure S7

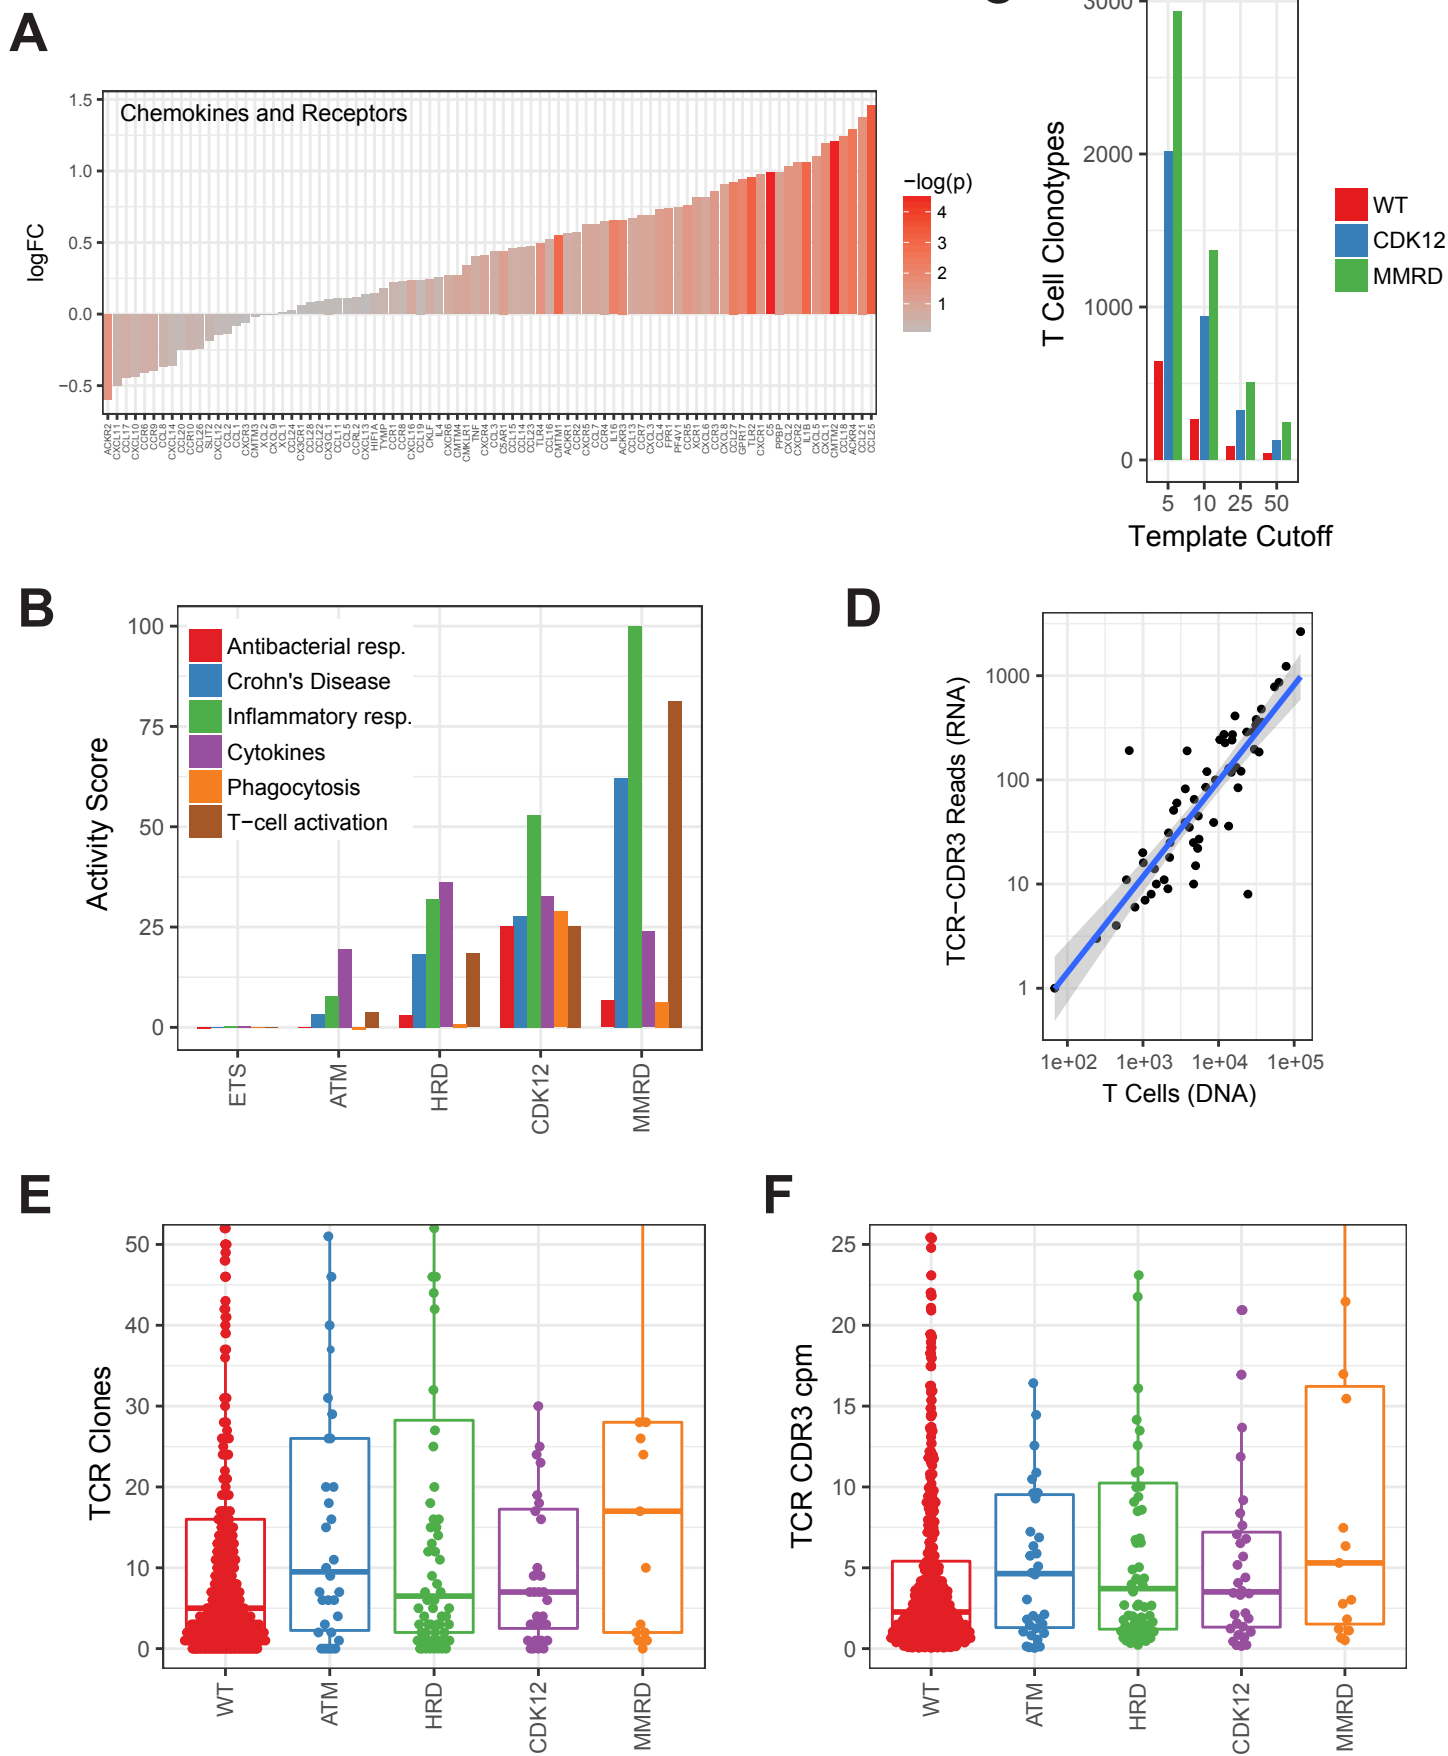

Supplement: NIHMS983138-supplement-S7.pdf [file NIHMS983138-supplement-S7.pdf]
